# Supplementary material
Source: PubMed Central journal article supplement (PMC9109719)
Supplement: NIHMS1794472-supplement-source_data_fig_2.pdf [file NIHMS1794472-supplement-source_data_fig_2.pdf]

**SourceData\_Fig2. The cell viability of harvested ce**

| Number | date     | donor  | cell viability |
|--------|----------|--------|----------------|
| 1      | 20190222 | HC2978 | 80             |
| 2      | 20190301 | HC176  | 92             |
| 3      | 20190301 | HC457  | 91             |
| 4      | 20190305 | HC176  | 84             |
| 5      | 20190305 | HC176  | 90             |
| 6      | 20190311 | HC2978 | 92             |
| 7      | 20190312 | HC176  | 68             |
| 8      | 20190319 | HC176  | 88             |
| 9      | 20190319 | HC176  | 85             |
| 10     | 20190326 | HC176  | 91             |
| 11     | 20190402 | HC176  | 85             |
| 12     | 20190405 | HC2978 | 70             |
| 13     | 20190405 | HC2978 | 85             |
| 14     | 20190411 | HC457  | 80             |
| 15     | 20190411 | HC100  | 75             |
| 16     | 20190412 | HC2978 | NA             |
| 17     | 20190419 | HC176  | 90             |
| 18     | 20190510 | HC176  | 92             |
| 19     | 20190509 | HC2978 | 85             |
| 20     | 20190516 | HC2978 | 83             |
| 21     | 20190523 | HC2978 | 86             |
| 22     | 20190524 | H176   | 82             |
| 23     | 20190530 | HC2978 | 85             |
| 24     | 20190606 | HC2978 | NA             |
| 25     | 20190613 | HC2978 | 87             |
| 26     | 20190620 | HC2978 | NA             |
| 27     | 20190624 | HC2978 | NA             |
| 28     | 20190701 | HC2978 | 83             |
| 29     | 20190708 | HC2978 | 88             |
| 30     | 20190715 | HC2978 | 90             |
| 31     | 20190722 | HC2978 | 88             |
| 32     | 20190820 | HC2978 | 84             |
| 33     | 20190916 | HC2978 | 63             |
| 34     | 20190916 | HC465  | 91             |
| 35     | 20190923 | HC2978 | 84             |
| 36     | 20190923 | HC465  | 91             |
| 37     | 20191101 | HC465  | 79             |
| 38     | 20200224 | HC176  | 90             |
