# Supplementary material
Source: PubMed Central journal article supplement (PMC9109719)
Supplement: NIHMS1794472-supplement-source_data_fig_7.pdf [file NIHMS1794472-supplement-source_data_fig_7.pdf]

**SourceData\_Fig7. TEER values of the monolayers 10 hours after co-culture with bacteria under different conditions. Related to Figure 7b**

|                | Ohm   |       |       |       | surface area (cm: Ohm cm <sup>2</sup> ) |       |       |       |       |
|----------------|-------|-------|-------|-------|-----------------------------------------|-------|-------|-------|-------|
|                | MT768 | MT798 | MT799 | MT800 | 1.12                                    | MT768 | MT798 | MT799 | MT800 |
| 1st experiment |       |       |       |       |                                         |       |       |       |       |
| NO             | 2680  | 2700  | 2610  | 2615  |                                         | 2393  | 2411  | 2330  | 2335  |
| aTC            | 2335  | 2430  | 2440  | 2550  |                                         | 2085  | 2170  | 2179  | 2277  |
| DCA            | 2400  | 2800  | 2600  | 2475  |                                         | 2143  | 2500  | 2321  | 2210  |
| DCA+ATC        | 2795  | 2910  | 2765  | 2675  |                                         | 2496  | 2598  | 2469  | 2388  |
|                |       |       |       |       |                                         |       |       |       |       |
|                | Ohm   |       |       |       | surface area (cm: Ohm cm <sup>2</sup> ) |       |       |       |       |
|                | MT768 | MT798 | MT799 | MT800 | 1.12                                    | MT768 | MT798 | MT799 | MT800 |
| 2nd experiment |       |       |       |       |                                         |       |       |       |       |
| NO             | 2010  | 2520  | 2115  | 1800  |                                         | 1795  | 2250  | 1888  | 1607  |
| aTC            | 2300  | 2160  | 2070  | 1980  |                                         | 2054  | 1929  | 1848  | 1768  |
| DCA            | 2505  | 2440  | 2225  | 1855  |                                         | 2237  | 2179  | 1987  | 1656  |
| DCA+ATC        | 930   | 1755  | 1600  | 1575  |                                         | 830   | 1567  | 1429  | 1406  |
