# Supplementary material
Source: PubMed Central journal article supplement (PMC9109719)
Supplement: NIHMS1794472-supplement-Sup_Fig_1.pdf [file NIHMS1794472-supplement-Sup_Fig_1.pdf]

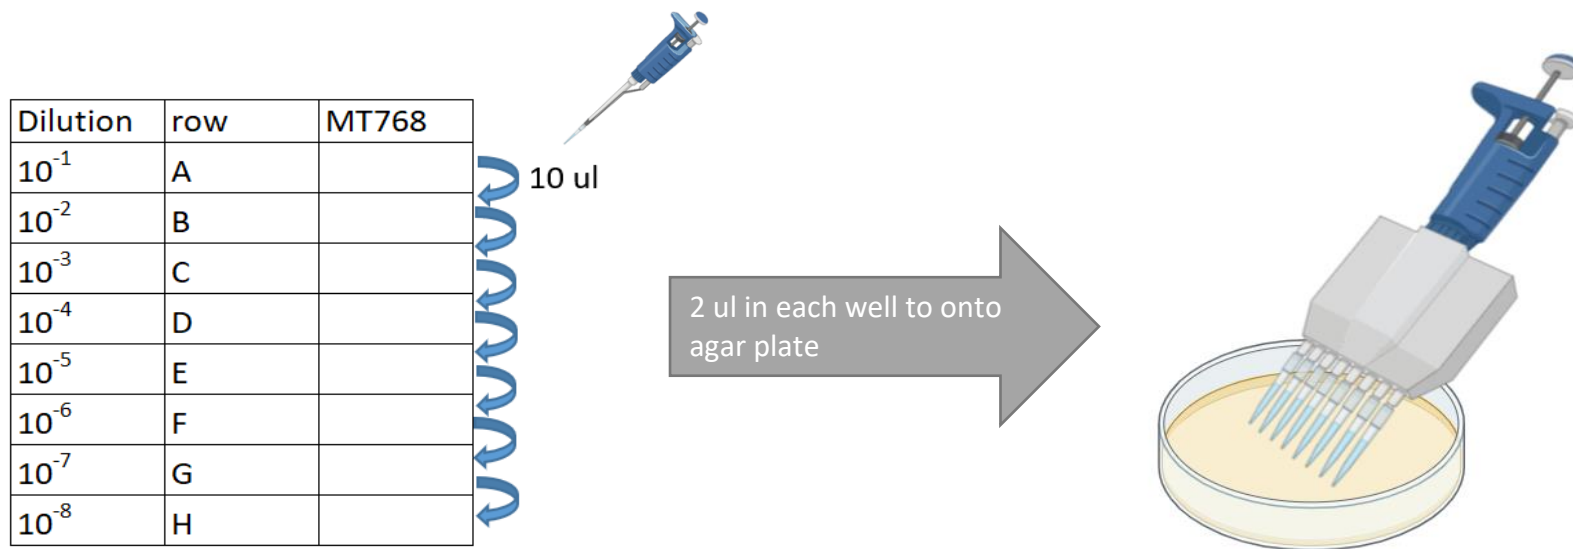

**Figure S1. Serial dilution and plating of bacterial culture. All steps are carried out in anaerobic workstation.**
