# Supplementary material
Source: PubMed Central journal article supplement (PMC9109719)
Supplement: NIHMS1794472-supplement-Sup_Table_1.pdf [file NIHMS1794472-supplement-Sup_Table_1.pdf]

Table S1. Growth curve of *B. thtaiotaomicron* MT768

| Time (h)       | OD600  | CFU/mL                                |             |
|----------------|--------|---------------------------------------|-------------|
|                |        | Replicate 1                           | Replicate 2 |
| 0              | 0.1276 | 8.50E+07                              | 9.50E+07    |
| 4.5            | 0.2436 | 9.50E+08                              | 9.00E+08    |
| 6              | 0.2736 | 2.00E+09                              | 3.50E+09    |
| 9              | 0.462  | 1.50E+10                              | 3.00E+10    |
| 10.5           | 0.7701 | 1.20E+11                              | 7.00E+10    |
| Doubling time: | 1.12 h | Y=Y0*exp(k*X); X is time, Y is CFU/ml |             |
