# Supplementary material
Source: PubMed Central journal article supplement (PMC9109719)
Supplement: NIHMS1794472-supplement-Sup_table_2.pdf [file NIHMS1794472-supplement-Sup_table_2.pdf]

Table S2. Calculation of RPUL from OD600 and luminescence data. Related to Figure 7e

| 1st experiment | OD    |       |       |       | blank | OD-blank |       |       |       | CFU      | Y0   | k       | luminescence reading |         |         |         | RLU/CFU |       |       |       | RPUL     |          |          |          |          |          |          |          |
|----------------|-------|-------|-------|-------|-------|----------|-------|-------|-------|----------|------|---------|----------------------|---------|---------|---------|---------|-------|-------|-------|----------|----------|----------|----------|----------|----------|----------|----------|
|                | MT768 | MT798 | MT799 | MT800 |       | MT768    | MT798 | MT799 | MT800 |          |      |         | MT768                | MT798   | MT799   | MT800   | MT768   | MT798 | MT799 | MT800 | MT768    | MT798    | MT799    | MT800    | MT768    | MT798    | MT799    | MT800    |
| NO             | 0.15  | 0.15  | 0.31  | 0.27  | 0.03  | 0.11     | 0.12  | 0.28  | 0.24  | 1.46E+09 | t=6h | 4.2E+07 | 4.3E+07              | 1.1E+08 | 8.5E+07 | NO      | 45905   | 2341  | 97429 | 1518  | 1.10E-03 | 5.44E-05 | 9.10E-04 | 1.78E-05 | 1.00E+00 | 4.93E-02 | 8.25E-01 | 1.61E-02 |
| aTC            | 0.15  | 0.15  | 0.24  | 0.27  |       | 0.12     | 0.12  | 0.21  | 0.24  |          |      | 4.3E+07 | 4.2E+07              | 7.1E+07 | 8.4E+07 | aTC     | 43691   | 724   | 7904  | 11210 | 1.03E-03 | 1.73E-05 | 1.11E-04 | 1.34E-04 | 1.00E+00 | 1.68E-02 | 1.08E-01 | 1.30E-01 |
| DCA            | 0.13  | 0.25  | 0.24  | 0.24  |       | 0.10     | 0.22  | 0.21  | 0.21  |          |      | 3.9E+07 | 7.4E+07              | 7.0E+07 | 7.0E+07 | DCA     | 39207   | 18986 | 17567 | 1518  | 1.01E-03 | 2.57E-04 | 2.50E-04 | 2.15E-05 | 1.00E+00 | 2.54E-01 | 2.46E-01 | 2.12E-02 |
| DCA+ATC        | 0.14  | 0.22  | 0.23  | 0.25  |       | 0.11     | 0.19  | 0.20  | 0.22  | 2.98E+09 |      | 4.0E+07 | 6.2E+07              | 6.6E+07 | 7.4E+07 | DCA+ATC | 36710   | 1462  | 9110  | 1575  | 9.25E-04 | 2.37E-05 | 1.38E-04 | 2.12E-05 | 1.00E+00 | 2.56E-02 | 1.49E-01 | 2.30E-02 |

  

| 2nd experiment | OD     |        |        |        | blank | OD minus blank |        |        |        | CFU      | Y0   | k       | luminescence reading |         |         |         | RLU/CFU |       |       |       | RPUL     |          |          |          |          |          |          |          |
|----------------|--------|--------|--------|--------|-------|----------------|--------|--------|--------|----------|------|---------|----------------------|---------|---------|---------|---------|-------|-------|-------|----------|----------|----------|----------|----------|----------|----------|----------|
|                | MT768  | MT798  | MT799  | MT800  |       | MT768          | MT798  | MT799  | MT800  |          |      |         | MT768                | MT788   | MT789   | MT800   | MT768   | MT798 | MT799 | MT800 | MT768    | MT798    | MT799    | MT800    | MT768    | MT798    | MT799    | MT800    |
| NO             | 0.2118 | 0.2084 | 0.2208 | 0.2926 |       | 0.1814         | 0.178  | 0.1904 | 0.2622 | 1.46E+09 | t=6h | 6.0E+07 | 5.9E+07              | 6.3E+07 | 9.5E+07 | NO      | 61031   | 2682  | 22392 | 596   | 1.01E-03 | 4.53E-05 | 3.53E-04 | 6.29E-06 | 1.00E+00 | 4.48E-02 | 3.49E-01 | 6.22E-03 |
| aTC            | 0.1847 | 0.1976 | 0.2244 | 0.2113 |       | 0.1543         | 0.1672 | 0.1194 | 0.1809 |          |      | 5.2E+07 | 5.8E+07              | 6.5E+07 | 6.0E+07 | aTC     | 29870   | 724   | 2001  | 1958  | 5.76E-04 | 1.30E-05 | 3.09E-05 | 3.25E-05 | 1.00E+00 | 2.26E-02 | 5.37E-02 | 5.65E-02 |
| DCA            | 0.2205 | 0.1912 | 0.2407 | 0.216  |       | 0.1901         | 0.1608 | 0.2103 | 0.1856 |          |      | 6.3E+07 | 5.4E+07              | 7.1E+07 | 6.2E+07 | DCA     | 57881   | 5094  | 3349  | 426   | 9.14E-04 | 9.47E-05 | 4.72E-05 | 6.90E-06 | 1.00E+00 | 1.04E-01 | 5.17E-02 | 7.55E-03 |
| DCA+ATC        | 0.1835 | 0.1856 | 0.1911 | 0.1932 |       | 0.1531         | 0.1552 | 0.1607 | 0.1628 |          |      | 5.2E+07 | 5.2E+07              | 5.4E+07 | 5.4E+07 | DCA+ATC | 43663   | 710   | 667   | 412   | 8.47E-04 | 1.36E-05 | 1.24E-05 | 7.57E-06 | 1.00E+00 | 1.61E-02 | 1.46E-02 | 8.94E-03 |

  

| Average of 8/20/19 and 8 MT768 |          |          |          |          |
|--------------------------------|----------|----------|----------|----------|
| NO                             | 1.00E+00 | 4.71E-02 | 5.87E-01 | 1.12E-02 |
| aTC                            | 1.00E+00 | 1.97E-02 | 8.10E-02 | 9.33E-02 |
| DCA                            | 1.00E+00 | 1.79E-01 | 1.49E-01 | 1.44E-02 |
| DCA+ATC                        | 1.00E+00 | 2.08E-02 | 8.19E-02 | 1.60E-02 |
