# Supplementary material
Source: PubMed Central journal article supplement (PMC9109719)
Supplement: NIHMS1794472-supplement-Sup_table_3.pdf [file NIHMS1794472-supplement-Sup_table_3.pdf]

**Table S3. The OD600 and luminescence signal for bacterial cells collected from top and bottom of the apical c**

|            |         | OD600 |       |       |       |         | luminescer |       |
|------------|---------|-------|-------|-------|-------|---------|------------|-------|
|            |         | MT768 | MT798 | MT799 | MT800 |         | MT768      | MT798 |
| Top media  | NO      | 0.08  | 0.08  | 0.08  | 0.11  | NO      | 17198      | 695   |
|            | aTC     | 0.06  | 0.06  | 0.07  | 0.13  | aTC     | 7081       | 383   |
|            | DCA     | 0.05  | 0.06  | 0.04  | 0.06  | DCA     | 7265       | 596   |
|            | DCA+ATC | 0.05  | 0.06  | 0.06  | 0.06  | DCA+ATC | 6428       | 241   |
| ottom medi | NO      | 0.11  | 0.12  | 0.28  | 0.24  | NO      | 45905      | 2341  |
|            | aTC     | 0.12  | 0.12  | 0.21  | 0.24  | aTC     | 43691      | 724   |
|            | DCA     | 0.10  | 0.22  | 0.21  | 0.21  | DCA     | 39207      | 18986 |
|            | DCA+ATC | 0.11  | 0.19  | 0.20  | 0.22  | DCA+ATC | 36710      | 1462  |

**Compartment in the transwell inserts**

**Optical density reading**

| MT799 | MT800 |
|-------|-------|
| 4612  | 241   |
| 1717  | 142   |
| 2852  | 114   |
| 2512  | 71    |
| 97429 | 1518  |
| 7904  | 11210 |
| 17567 | 1518  |
| 9110  | 1575  |
